# Supplementary material
Source: Royal Society of Chemistry journal article supplement (doi:10.1039/d6nr00915h)
Supplement: d6nr00915h1.pdf [file d6nr00915h1.pdf]

## Supporting Information

### **High and rapid perfluorooctanoic acid capture by MOF-818 via synergistic adsorption**

Xingyue Yang<sup>a,b,#</sup>, Xin Fang<sup>a,b,#</sup>, Xinyuan Zhu<sup>b</sup>, Meina Liu<sup>a,\*</sup>, Youfu Wang<sup>b,\*</sup> and Xin Jin<sup>b,\*</sup>

<sup>a</sup> *Faculty of Chemical Engineering and Energy Technology, Shanghai Institute of Technology, 100 Haiquan Road, Shanghai 201418, P. R. China*

<sup>b</sup> *School of Chemistry and Chemical Engineering, State Key Laboratory of Polyolefins and Catalysis, Shanghai Jiao Tong University, Shanghai 200240, China*

# Xingyue Yang and Xing Fang contributed equally to this work.

\* Corresponding author.

*E-mail address:* meina.liu@sit.edu.cn (M. Liu), wyfown@sjtu.edu.cn (Y. Wang), jxcindy@sjtu.edu.cn (X. Jin)

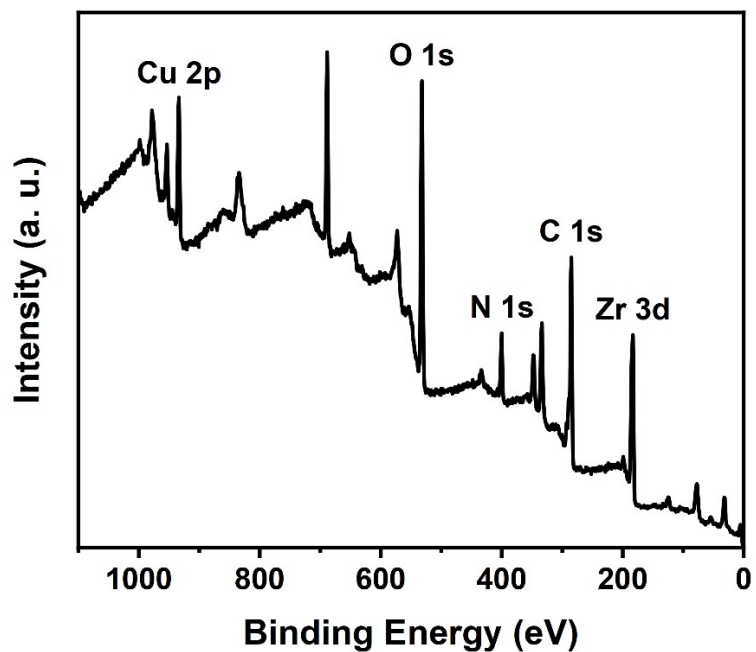

Fig. S1 The XPS survey spectrum of MOF-818.

| Element | Line | At. % | Wt. % | Net Counts | At. % Error | Wt. % Error |
|---------|------|-------|-------|------------|-------------|-------------|
| C       | K    | 84.0  | 74.2  | 625 171    | 0.4         | 0.3         |
| N       | K    | 10.4  | 10.8  | 6 354      | 1.0         | 1.1         |
| F       | K    | 3.9   | 5.5   | 14 117     | 0.1         | 0.1         |
| Cu      | K    | 1.0   | 4.8   | 4 730      | 0.1         | 0.3         |
| Zr      | L    | 0.7   | 4.7   | 32 780     | 0.0         | 0.2         |

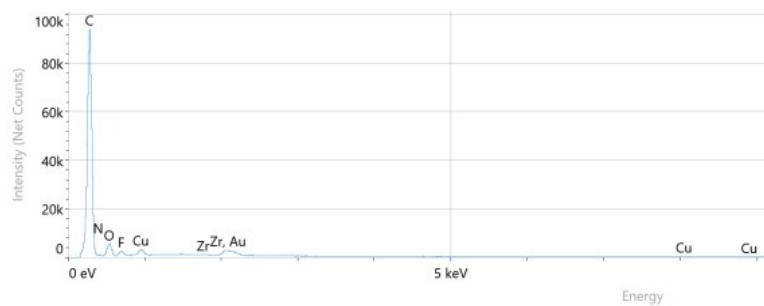

Fig. S2 The elemental content of MOF-818 from SEM-EDS.

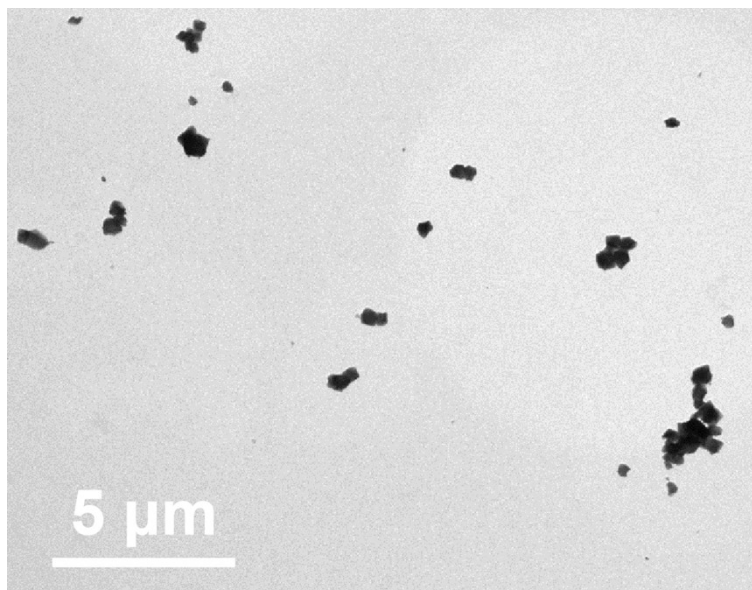

**Fig. S3** The TEM image of MOF-818.

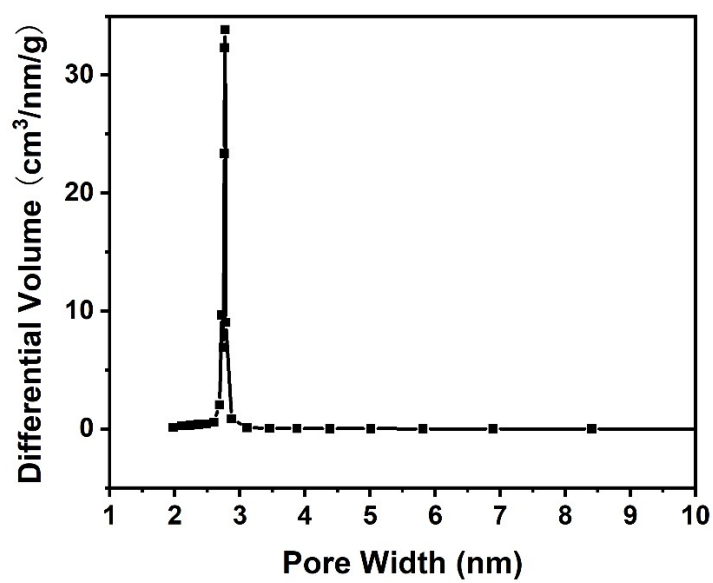

**Fig. S4** The pore size distribution of MOF-818.

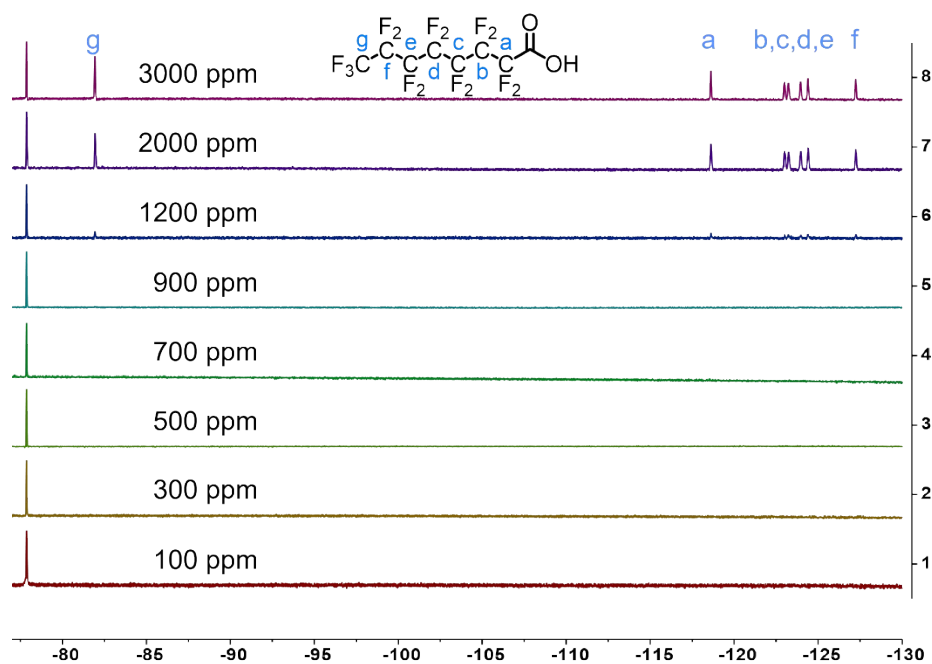

**Fig. S5** <sup>19</sup>F NMR analysis of PFOA adsorption by MOF-818 under different concentrations.

**Table S1** The residual metal ions in the supernatant for selective adsorption experiment.

| Ion Type    | Na <sup>+</sup> | Mg <sup>2+</sup> | K <sup>+</sup> | Ca <sup>2+</sup> | Fe <sup>3+</sup> |
|-------------|-----------------|------------------|----------------|------------------|------------------|
| Residue (%) | 99.23           | 99.46            | 99.53          | 99.31            | 99.33            |

**Table S2** The comparison of PFOA adsorption performance of representative adsorbents.

| Adsorbent        | Material Type           | Adsorption Capacity (mg/g) | Balance Time (min) | Recyclability |
|------------------|-------------------------|----------------------------|--------------------|---------------|
| PCN-999          | MOF                     | 1089                       | 720                | Yes           |
| MIL-101-Cr-QDMEN | MOF                     | 754                        | 60                 | Yes           |
| MIL-101-Cr-DMEN  | MOF                     | 534                        | 60                 | Yes           |
| UiO-67           | MOF                     | 743                        | 20                 | Yes           |
| NU-1000          | COF                     | 507                        | 1                  | Yes           |
| CTF500-15        | COF                     | 323                        | 30                 | Yes           |
| POP-4F           | Porous Organic Polymers | 107                        | 5                  | Yes           |
| MOF-818          | MOF                     | 1510                       | 5                  | Yes           |

| Element | Line | At. % | Wt. % | Net Counts | At. % Error | Wt. % Error |
|---------|------|-------|-------|------------|-------------|-------------|
| C       | K    | 83.3  | 76.5  | 1 345 214  | 0.4         | 0.3         |
| N       | K    | 8.3   | 8.8   | 9 246      | 0.8         | 0.8         |
| F       | K    | 7.9   | 11.5  | 55 022     | 0.1         | 0.1         |
| Cu      | K    | 0.2   | 0.8   | 1 403      | 0.0         | 0.1         |
| Zr      | L    | 0.3   | 2.4   | 29 724     | 0.0         | 0.2         |

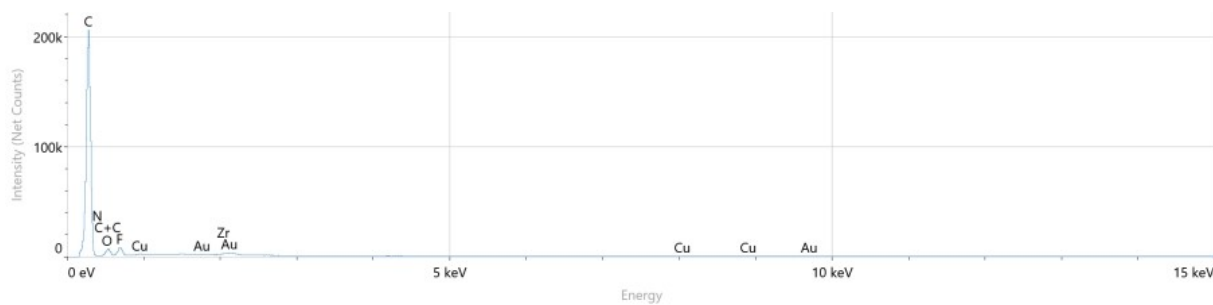

**Fig. S6** The elemental content of PFOA@MOF-818 from SEM-EDS.

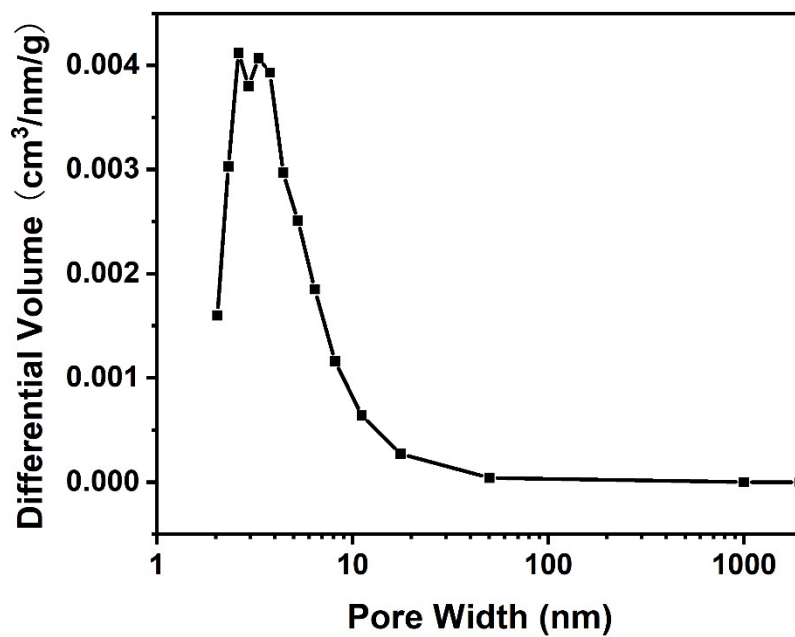

**Fig. S7** The pore size distribution of PFOA@MOF-818.

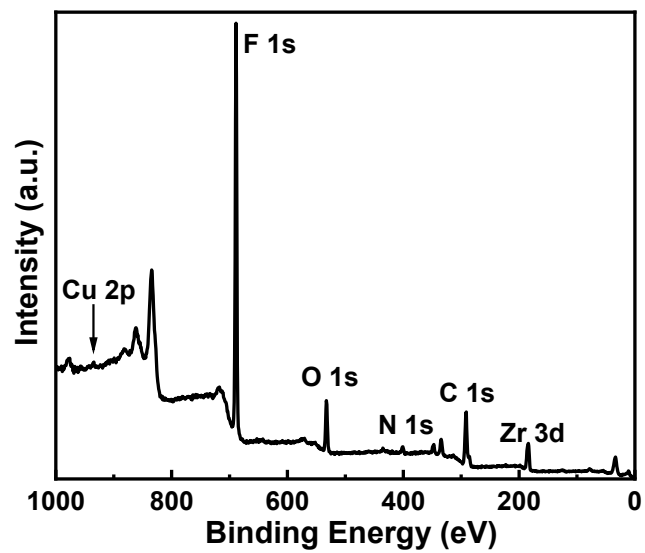

**Fig. S8** The XPS survey spectrum of PFOA@MOF-818.
